# Supplementary material for: Woven fabric-based separators with low tortuosity for sodium-ion batteries
Source: Royal Society of Chemistry journal article supplement (doi:10.1039/d3nr06536g), 2024-01-01
Supplement: d3nr06536g1.pdf [file d3nr06536g1.pdf]

## **Woven Fabric-based Separators with Low-tortuosity for Sodium-ion Batteries**

Tianyun Zhang <sup>a,b,1,\*</sup>, Lirong Zhang <sup>a,1</sup>, Fujuan Wang <sup>b</sup>, Yanci Wang <sup>a</sup>, Tian Zhang <sup>a</sup>, Fen Ran <sup>b,\*</sup>

<sup>a</sup> *School of Mechanical and Electrical Engineering, Department of Textile Engineering, Lanzhou University of Technology, Lanzhou 730050, China*

<sup>b</sup> *State Key Laboratory of Advanced Processing and Recycling of Non-ferrous Metals, School of Materials Science and Engineering, Department of Polymeric Materials Engineering, Lanzhou University of Technology, Lanzhou 730500, China*

<sup>1</sup> *These authors contribute equally to this work.*

*\* Corresponding Authors: Dr. Tianyun Zhang (E-mail: [zhangtianyun@lut.edu.cn](mailto:zhangtianyun@lut.edu.cn)); and Dr. Prof. Fen Ran (E-mail: [ranfen@lut.edu.cn](mailto:ranfen@lut.edu.cn)).*

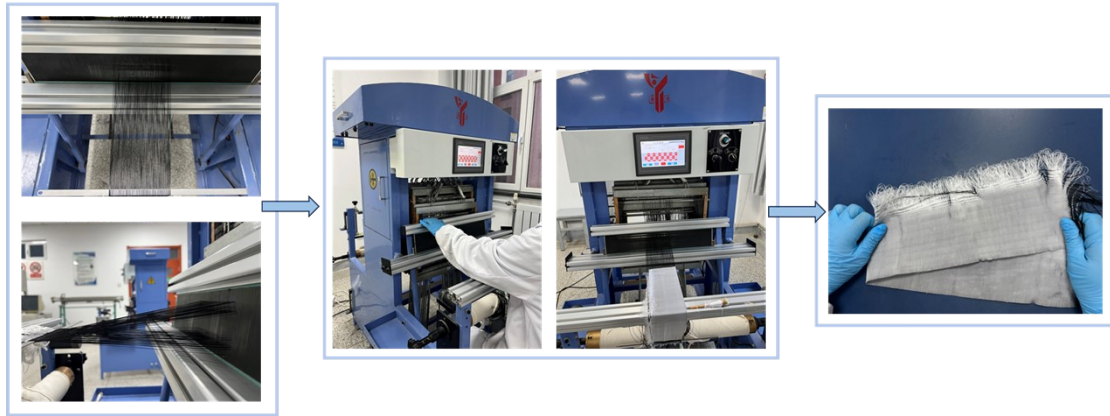

*Figure S1 Weaving process of woven fabric substrate.*

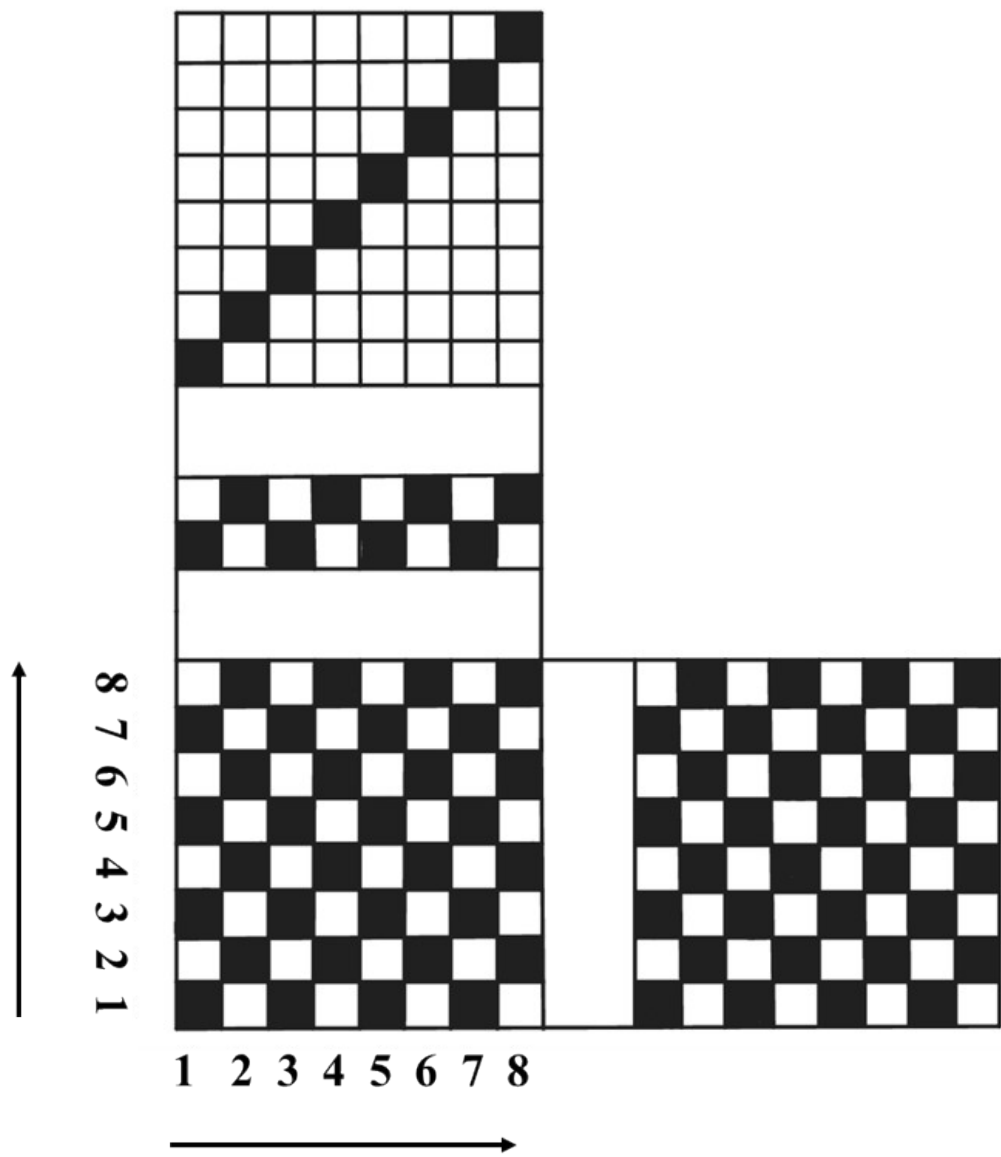

*Figure S2* Fabric structure chart of PW (the black squares represent the warp interlacing points and the blank squares represent the weft interlacing points).

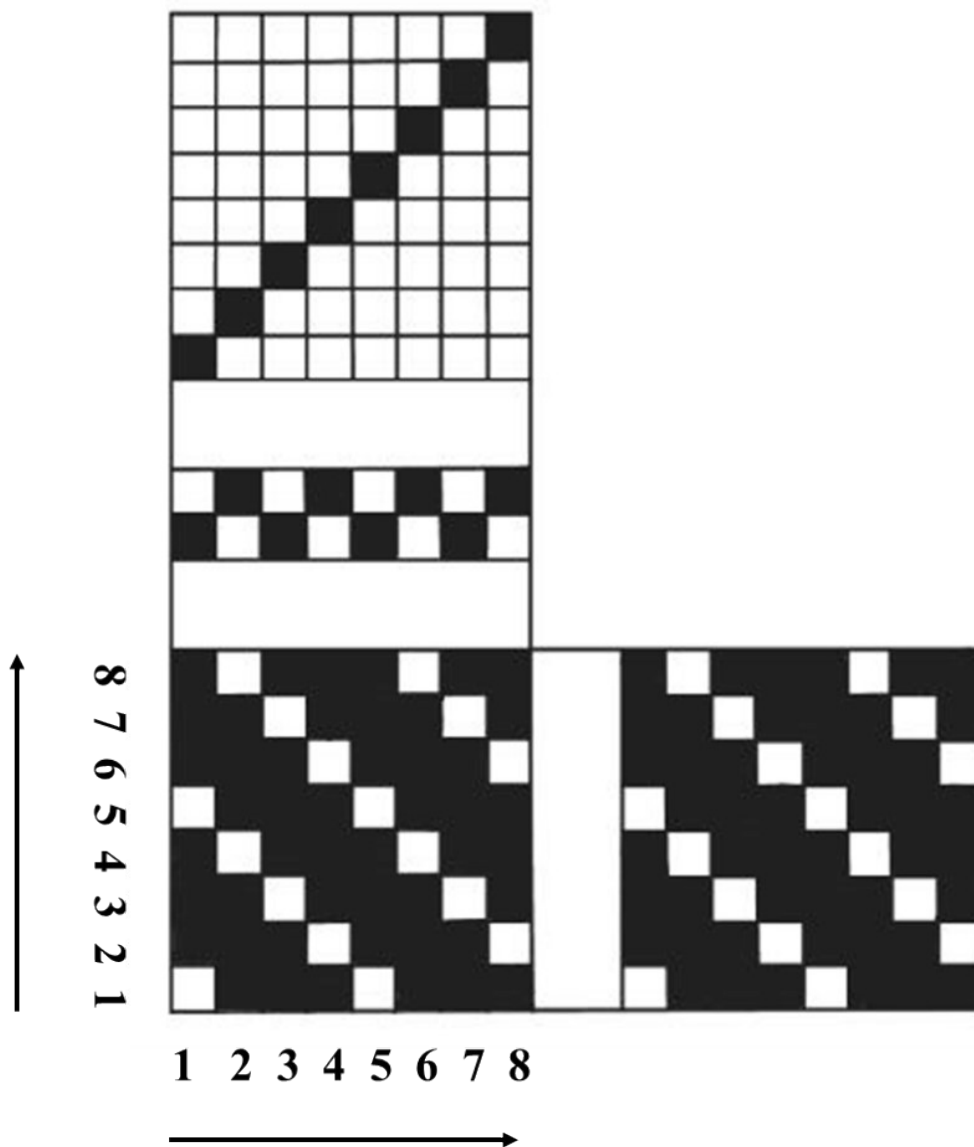

*Figure S3* Fabric structure chart of TW (the black squares represent the warp interlacing points and the blank squares represent the weft interlacing points).

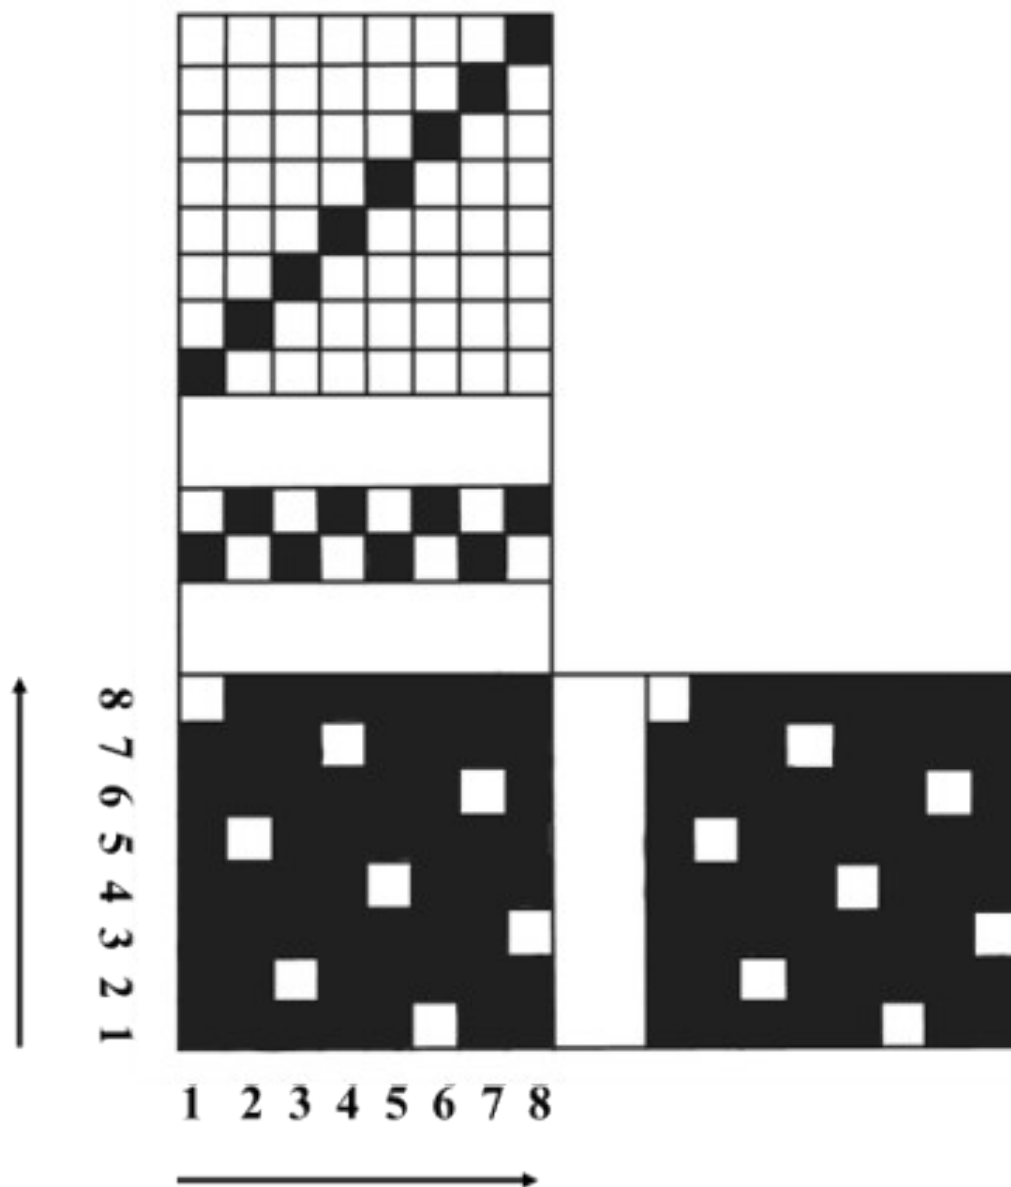

**Figure S4** Fabric structure chart of SW (the black squares represent the warp interlacing points and the blank squares represent the weft interlacing points).



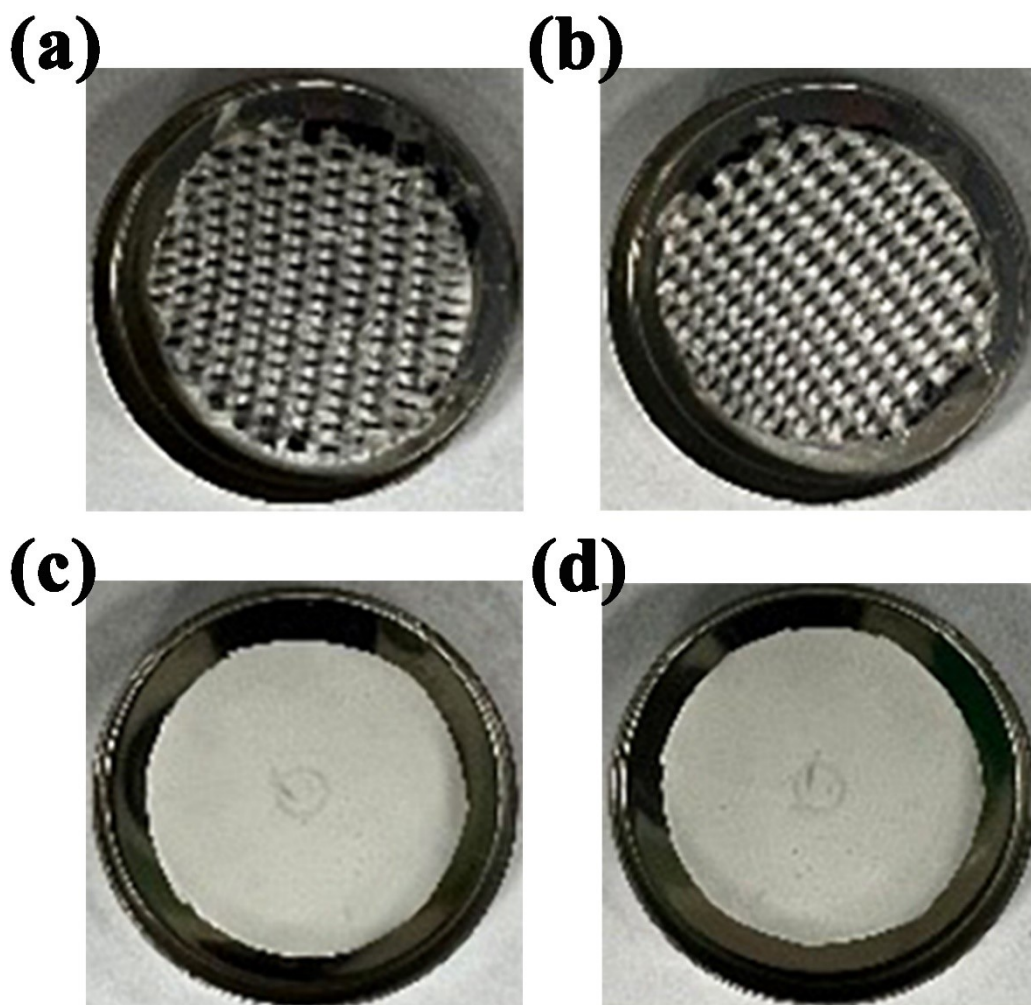

**Figure S6** Thermal stability of TBC-WS (a) in initial state and (b) after 100 °C for 1 h; PP (c) in initial state and (d) after 100 °C for 1 h.

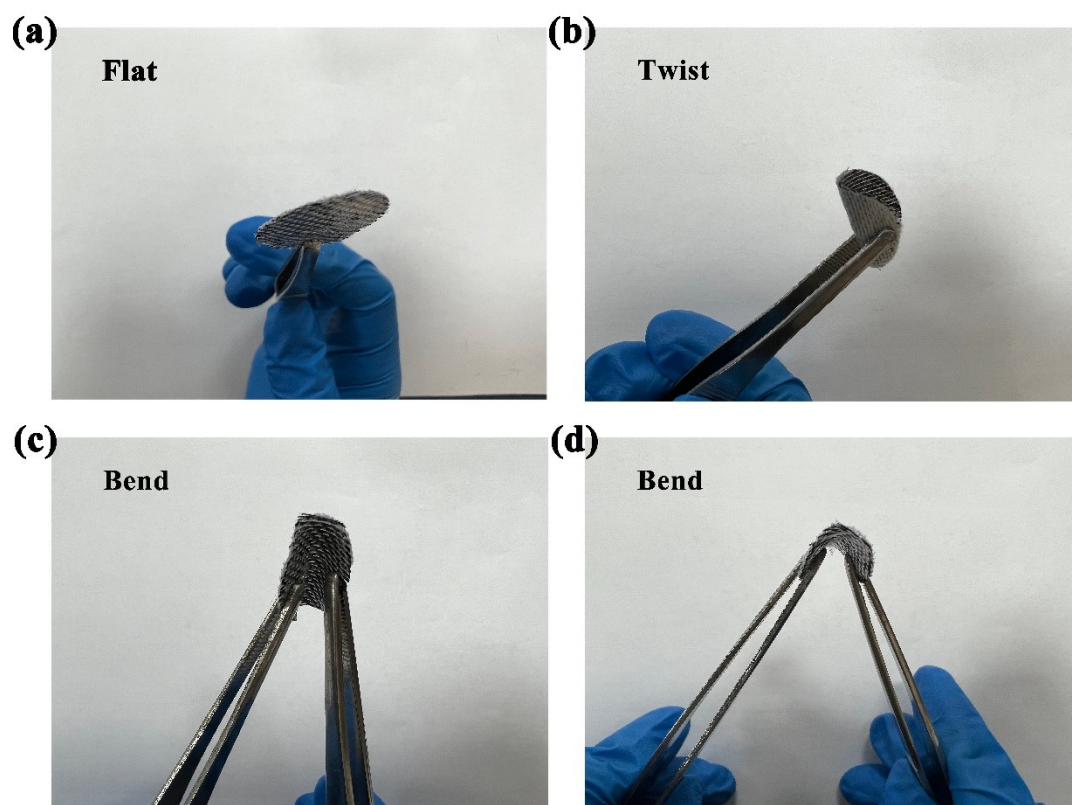

**Figure S7** Optical photograph of TBC-WS at different bending states: (a)flat, (b)twist, (c) and (d) bend.



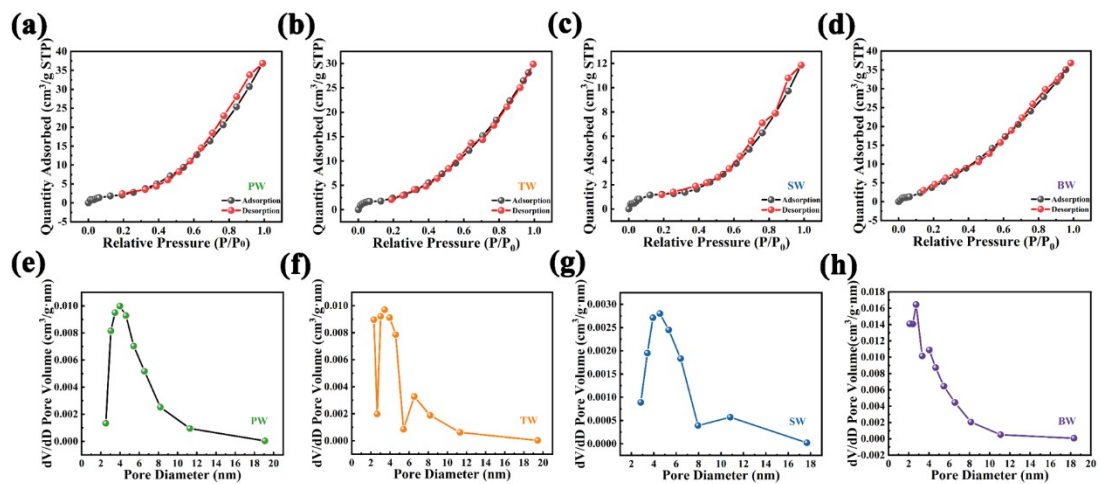

**Figure S8**  $N_2$  adsorption/desorption isotherm of (a) PW, (b) TW, (c) SW and (d) BW, pore size distribution of (e) PW, (f) TW, (g) SW and (h) BW.

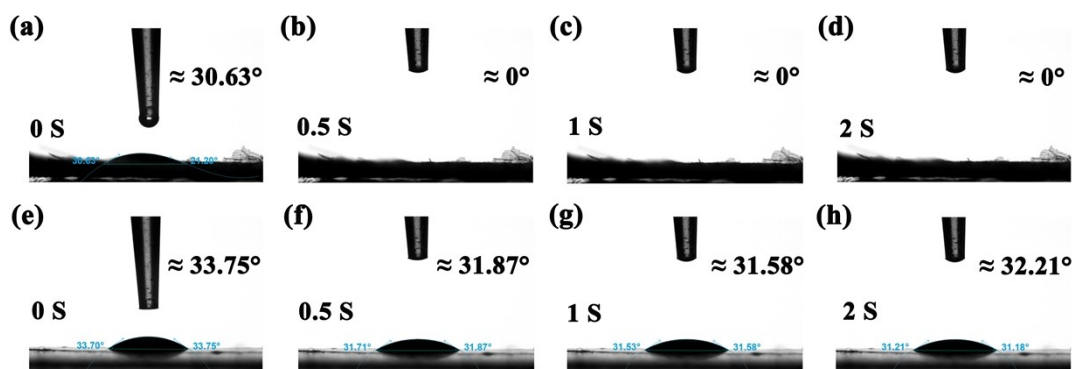

*Figure S9* Contact angles of (a-d) BW separator and (e-h) PP separator at different time.

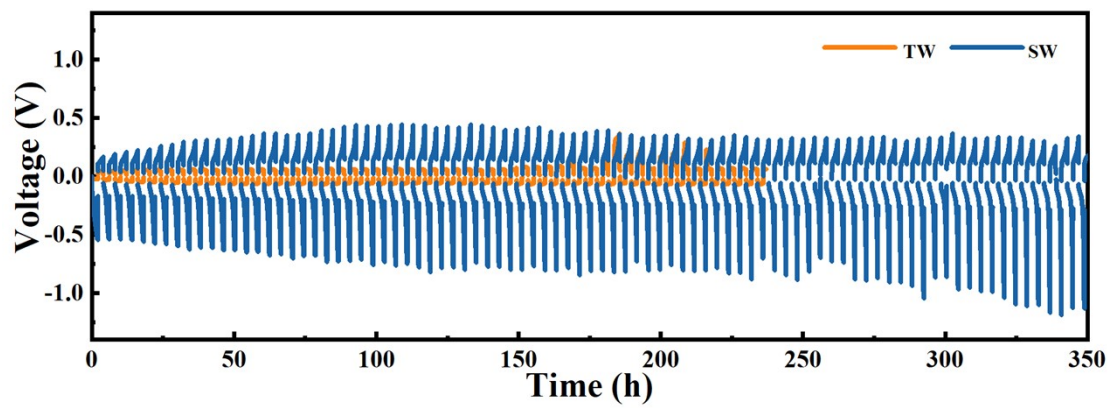

*Figure S10* Voltage-time images of TW and SW at  $0.5 \text{ mA cm}^{-2}$ ,  $1 \text{ mAh cm}^{-2}$ .

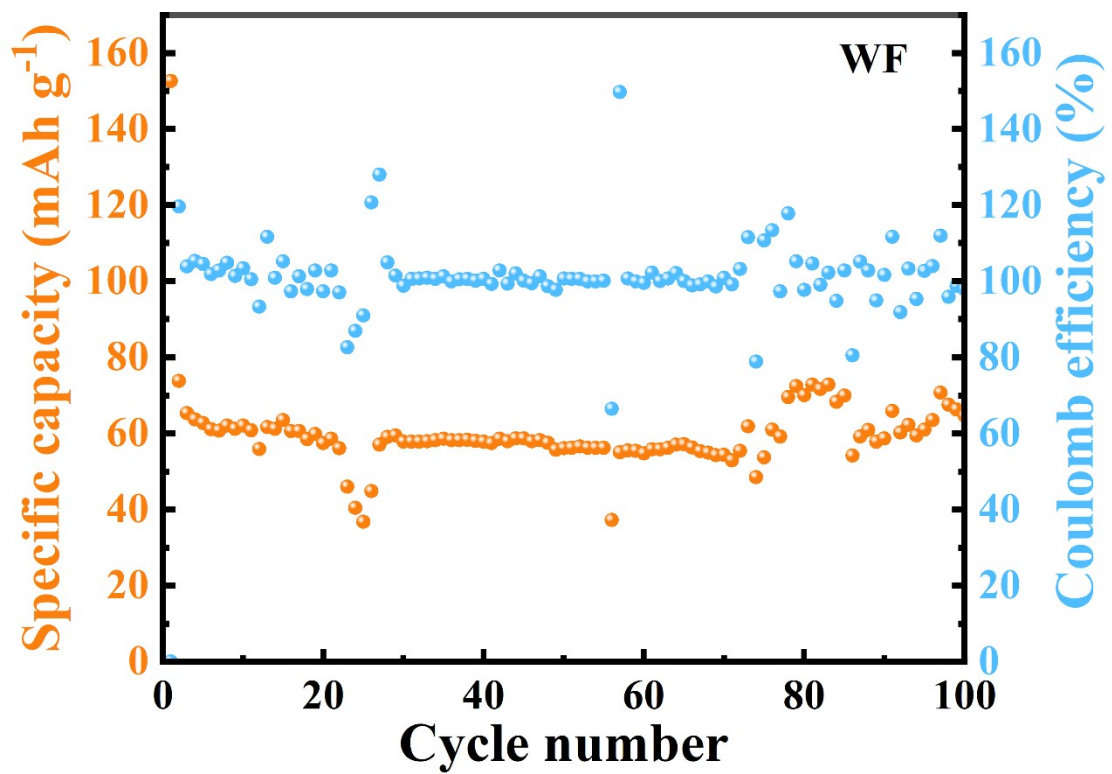

Figure S11 Cycle curves under  $0.03 \text{ A g}^{-1}$  of HC||Na half-cell with pure WF without TBC slurry.

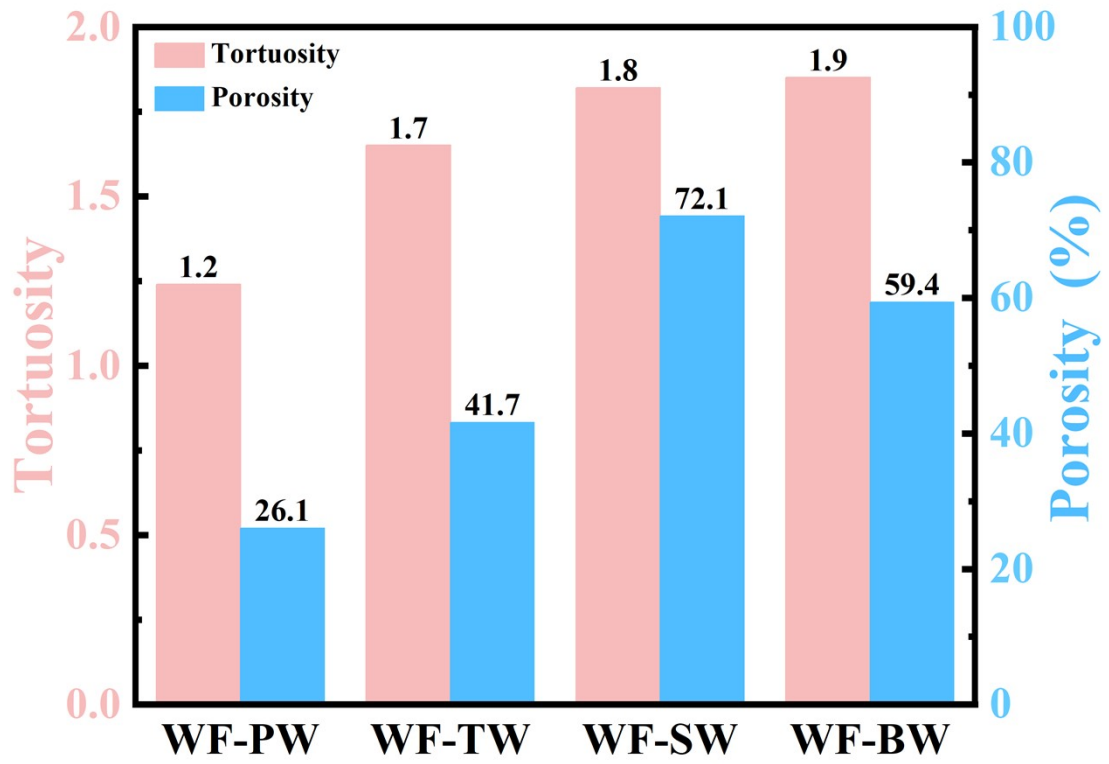

*Figure S12 Tortuosity and porosity pure WF without TBC slurry.*
